# Supplementary material for: Confronting species aesthetics with ecological functions in coral reef fish
Source: PubMed Central journal article supplement (PMC6079033; doi:10.1038/s41598-018-29637-7), 2018-08-06
Supplement: 41598_2018_29637_MOESM1_ESM.pdf [file 41598_2018_29637_MOESM1_ESM.pdf]

## Supplementary Figures

### Confronting species aesthetics with ecological functions in coral reef fish

Anne-Sophie Tribot <sup>\*1</sup>, Quentin Carabeux<sup>1</sup>, Julie Deter<sup>2,3</sup>, Thomas Claverie<sup>1,4</sup>, Sébastien Villéger<sup>1</sup>, Nicolas Mouquet <sup>\*1</sup>

1- MARBEC (MARine Biodiversity Exploitation and Conservation), Université de Montpellier, CNRS-IRD-IFREMER, Montpellier, France

2- Institut des Sciences de l'Evolution (ISEM)–UMR 5554 CNRS-UM-IRD, Université de Montpellier, Montpellier, France

3- Andromède Océanologie, Carnon, France

4- Centre Universitaire de formation et de recherche de Mayotte, Mayotte

E-mail addresses:

Quentin Carabeux: [quentin.carabeux@orange.fr](mailto:quentin.carabeux@orange.fr)

Julie Deter: [julie.deter@umontpellier.fr](mailto:julie.deter@umontpellier.fr)

Thomas Claverie: [thomas.claverie@univ-mayotte.fr](mailto:thomas.claverie@univ-mayotte.fr)

Sébastien Villéger: [sebastien.villeger@cnrs.fr](mailto:sebastien.villeger@cnrs.fr)

\*Corresponding authors:

Anne-Sophie Tribot: [anne-sophie.tribot@umontpellier.fr](mailto:anne-sophie.tribot@umontpellier.fr)

Nicolas Mouquet: [nicolas.mouquet@cnrs.fr](mailto:nicolas.mouquet@cnrs.fr)

## Supplementary Figure 1: Bootstrapping of the aesthetic scores

**a)** Variations in the aesthetic scores of three photos according to the number of matches played during the questionnaire, without bootstrapping. Top: aesthetic scores of the most attractive fish (*Pomacanthus semicirculatus*) calculated for 1,663 matches. Middle: aesthetic scores for the median fish (*Plectropomus laevis*) calculated for 1,706 matches. Below: aesthetic scores of the least attractive fish (*Labrichtys unilineatus* female) calculated for 1,652 matches. **b)** Stabilization of mean aesthetic scores during the bootstrap procedure (1,000-fold randomly ordered matches). Top: mean aesthetic score of the most attractive fish (*Pomacanthus semicirculatus*). Middle: mean aesthetic score of the median attractive fish (*Plectropomus laevis*). Below: mean aesthetic score of the least attractive fish (*Labrichtys unilineatus* female). Shaded areas correspond to standard deviations. Photographs: Randall, J. E. from FishBase.org.

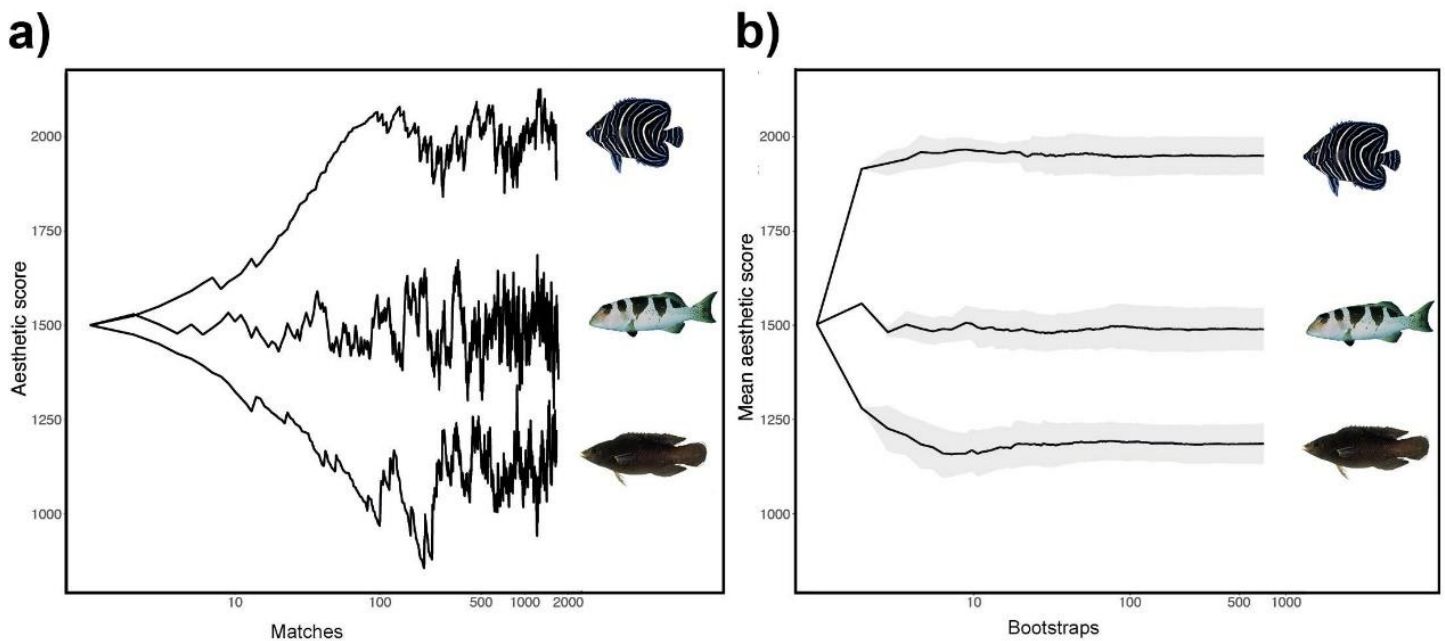

## Supplementary Figure 2: Aesthetic scores according to divers and non-divers

Blue points: mean aesthetic scores calculated with matches judged by divers. Blue ribbons: standard deviations calculated with matches judged by divers. Green points: mean aesthetic scores calculated with matches judged by non-divers. Green ribbons: standard deviations calculated with matches judged by non-divers. Fish species shown: 60: *Chromis nigroanalis*, 102: *Monotaxis grandoculis* juvenile, 156: *Stethojulis albobittata* female, 86: *Kyphosus cinerascens*, 50: *Scarus niger* juvenile, 30: *Aulostomus chinensis*, 62: *Chromis viridis*, 123: *Parupeneus trifasciatus*, 19: *Arothron meleagris*, 109: *Naso brevirostris*, 79: *Gymnothorax favagineus*, 29: *Arothron stellatus*, 114: *Ostracion meleagris* male, 18: *Arothron meleagris*, 141: *Rhinecanthus aculeatus*, 116: *Oxymonacanthus longirostris*, 18, 19, 22, 23, 27, 28: *Arothron nigropunctatus*. For all species shown, differences between aesthetic scores for divers and non-divers were significant (Wilcoxon-Mann-Witney testn, all p-values  $< 2 \times 10^{-16}$ ). Photographs: Randall, J. E from FishBase.org.

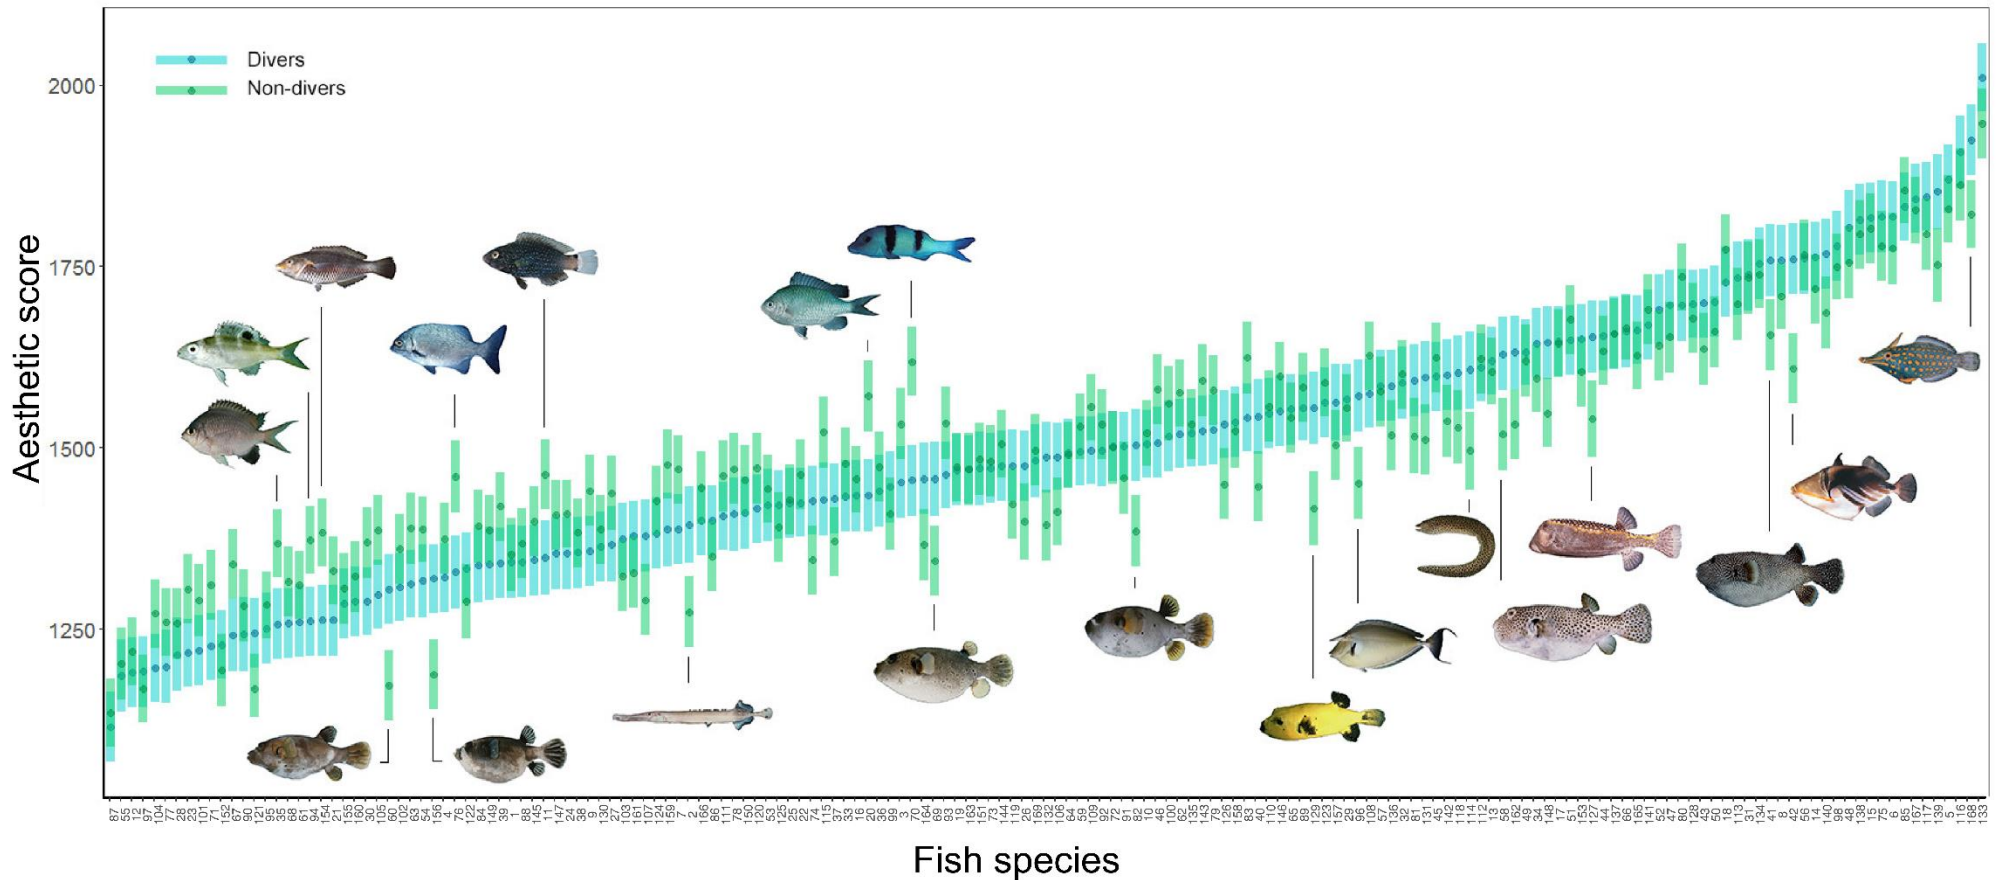

### Supplementary Figure 3: Functional traits values along the three axes of the functional space.

PC1 explained 44.52% of the variance, PC2 explained 27.92%, and PC3 explained 15.16% (total = 87.62%). **Size:** 0-7 cm (S1); 7.1-15 cm (S2); 15.1- 30 cm (S3); 30.1-50 cm (S4); 50.1-80 cm (S5); >80 cm (S6). **Mobility:** sedentary (Sed); mobile within a reef (Mob); highly mobile i.e., between reefs (VMob). **Activity:** Diurnal; diurnal & nocturnal (Both); Nocturnal. **Schooling:** solitary (Sol); pairing (Pair); small group (SGroup); medium group (MGroup); large group (LGroup). **Position:** bottom (Bottom); above bottom (Low); pelagic (High). **Diet:** HD = herbivorous-detritivorous; HM = herbivorous macro-algal; IS = invertivorous sessile; IM = invertivorous mobile; PK = planktonivorous; FC = Pelagic macro-organisms; OM = omnivorous (herbivorous and/or detritivorous AND carnivorous). **Sq:** Sum of squares of each variable calculated using ANOVA divided by the total sum of squares.

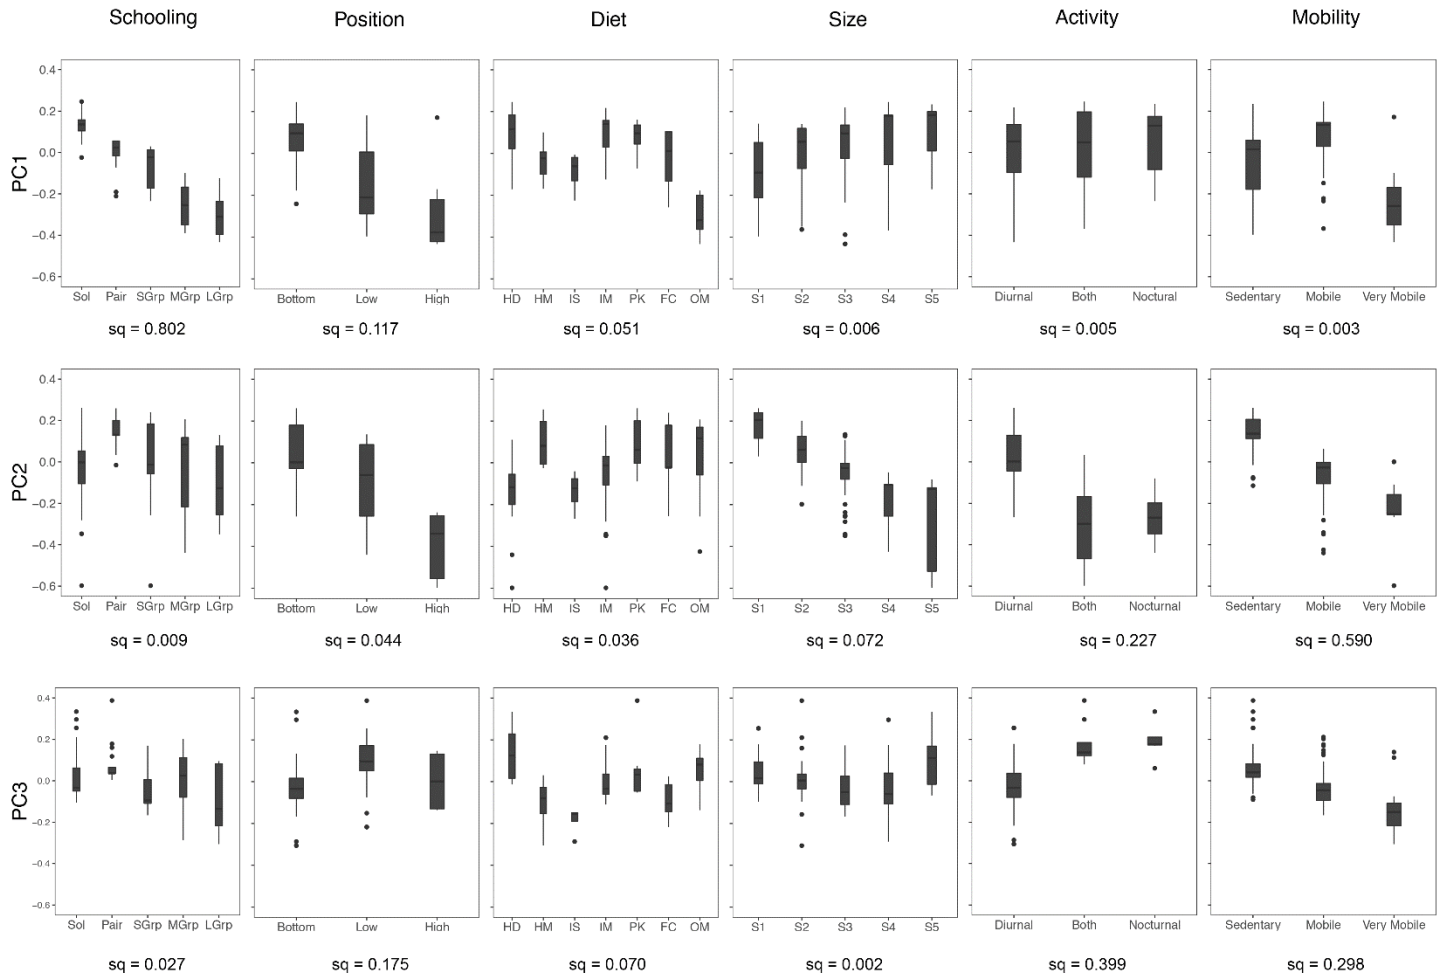

### Supplementary Figure 4: Mean aesthetic scores of families

Mean and standard deviations of aesthetic scores for each family. P-value of variable 'Family' in the model =  $6.927 \times 10^{-4}$ , sum of squares = 0.324. The asterisks represent the p-values of an ANOVA that tests the effect of each family on the mean aesthetic scores of fish: '\*\*\*' < 0.001, '\*' < 0.05. For Zanclidae, the sum of squares (sum of squares of the family divided by total sum of squares) = 0.028, Scorpaenidae = 0.020, Monacanthidae = 0.022, Chaetodontidae = 0.091, Lutjanidae = 0.021.

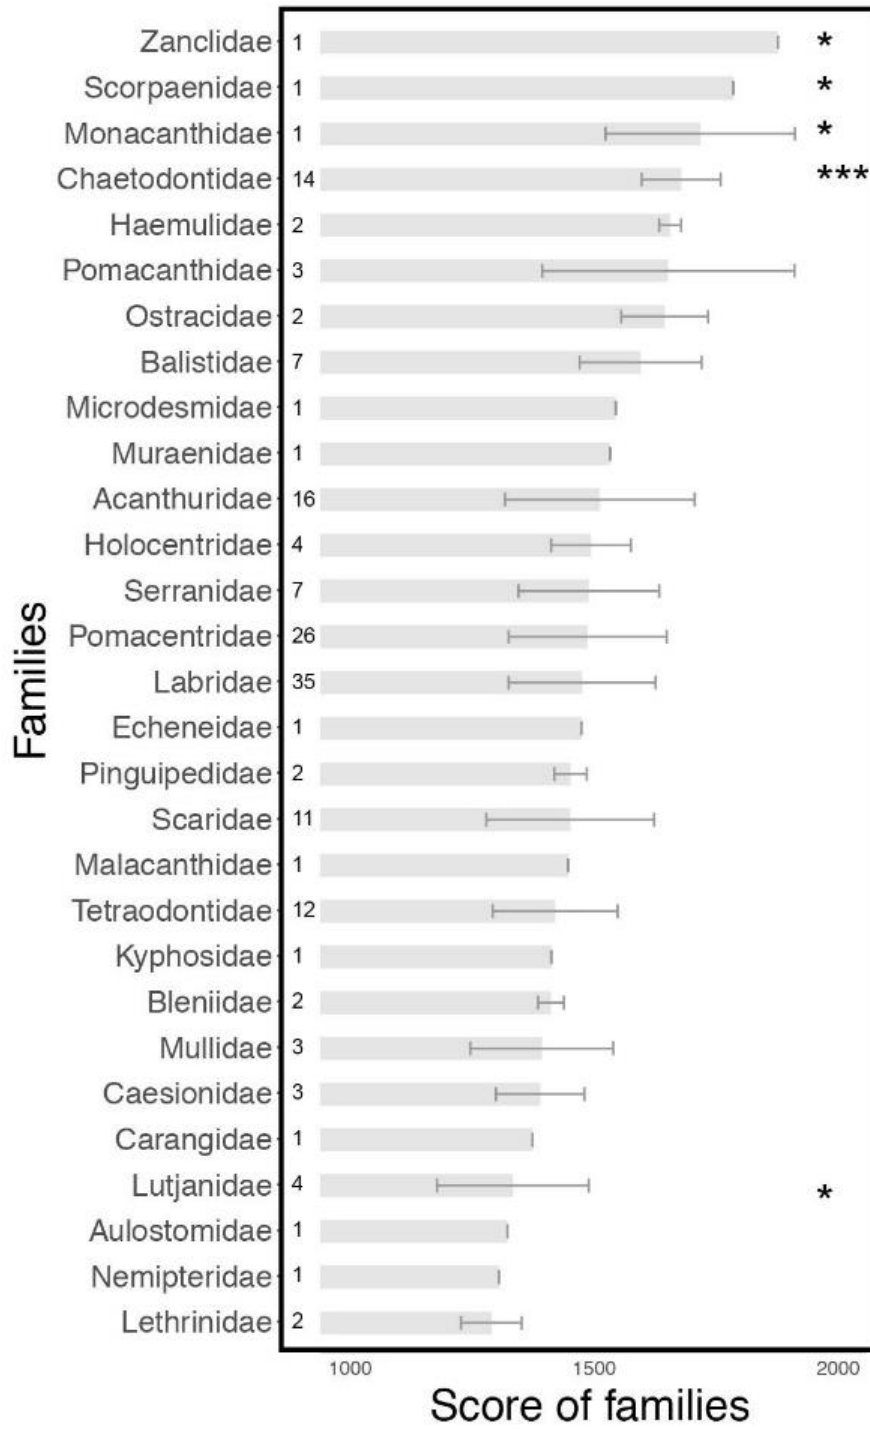

**Supplementary Table 1: List of fish species**

| <b>Species name</b>       | <b>Species number</b> | <b>Mean Aesthetic score</b> | <b>SD Aesthetic score</b> | <b>Family</b>  | <b>Genus</b>  |
|---------------------------|-----------------------|-----------------------------|---------------------------|----------------|---------------|
| Abudefduf_notatus         | 1                     | 1362.977                    | 47.051                    | Pomacentridae  | Abudefduf     |
| Abudefduf_sparoides       | 2                     | 1408.883                    | 48.377                    | Pomacentridae  | Abudefduf     |
| Abudefduf_viagensis       | 3                     | 1447.977                    | 50.552                    | Pomacentridae  | Abudefduf     |
| Acanthurus_nigricauda     | 4                     | 1345.342                    | 49.401                    | Acanthuridae   | Acanthurus    |
| Acanthurus_leucosternon   | 5                     | 1843.976                    | 47.021                    | Acanthuridae   | Acanthurus    |
| Acanthurus_lineatus       | 6                     | 1800.780                    | 48.461                    | Acanthuridae   | Acanthurus    |
| Acanthurus_nigrofuscus    | 7                     | 1405.228                    | 47.845                    | Acanthuridae   | Acanthurus    |
| Acanthurus_tennentii      | 8                     | 1730.225                    | 48.758                    | Acanthuridae   | Acanthurus    |
| Acanthurus_thompsoni      | 9                     | 1379.417                    | 48.272                    | Acanthuridae   | Acanthurus    |
| Acanthurus_triostegus     | 10                    | 1517.963                    | 47.299                    | Acanthuridae   | Acanthurus    |
| Acanthurus_tristis        | 11                    | 1371.510                    | 48.075                    | Acanthuridae   | Acanthurus    |
| Aethaloperca_rogae        | 12                    | 1199.715                    | 48.532                    | Serranidae     | Aethaloperca  |
| amphiprion_akallopis      | 13                    | 1597.343                    | 49.716                    | Pomacentridae  | Amphiprion    |
| amphiprion_latifasciatus  | 14                    | 1754.417                    | 47.681                    | Pomacentridae  | Amphiprion    |
| Anampses_meleagrides_fem  | 15                    | 1787.457                    | 49.224                    | Labridae       | Anampses      |
| Anampses_meleagrides_male | 16                    | 1441.156                    | 49.453                    | Labridae       | Anampses      |
| Anampses_twistii          | 17                    | 1617.757                    | 46.994                    | Labridae       | Anampses      |
| Arothron_meleagris_black  | 18                    | 1688.140                    | 49.902                    | Tetraodontidae | Arothron      |
| Arothron_meleagris_yellow | 19                    | 1467.979                    | 49.724                    | Tetraodontidae | Arothron      |
| Arothron_nigropunctatus1  | 20                    | 1443.158                    | 49.406                    | Tetraodontidae | Arothron      |
| Arothron_nigropunctatus2  | 21                    | 1305.013                    | 48.946                    | Tetraodontidae | Arothron      |
| Arothron_nigropunctatus3  | 22                    | 1433.405                    | 49.662                    | Tetraodontidae | Arothron      |
| Arothron_nigropunctatus4  | 23                    | 1243.354                    | 47.143                    | Tetraodontidae | Arothron      |
| Arothron_nigropunctatus5  | 24                    | 1372.886                    | 47.193                    | Tetraodontidae | Arothron      |
| Arothron_nigropunctatus6  | 25                    | 1431.619                    | 48.677                    | Tetraodontidae | Arothron      |
| Arothron_nigropunctatus7  | 26                    | 1478.849                    | 51.280                    | Tetraodontidae | Arothron      |
| Arothron_nigropunctatus8  | 27                    | 1385.286                    | 51.214                    | Tetraodontidae | Arothron      |
| Arothron_nigropunctatus9  | 28                    | 1231.306                    | 47.802                    | Tetraodontidae | Arothron      |
| Arothron_stellatus        | 29                    | 1556.810                    | 50.661                    | Tetraodontidae | Arothron      |
| Aulostolus_chinensis      | 30                    | 1321.839                    | 52.720                    | Aulostomidae   | Aulostomus    |
| Balistapus_undulatus      | 31                    | 1712.549                    | 48.781                    | Balistidae     | Balistapus    |
| Balistoides_viridescens   | 32                    | 1566.473                    | 50.464                    | Balistidae     | Balistoides   |
| Bodianus_axillaris        | 33                    | 1439.169                    | 47.090                    | Lanridae       | Bodianus      |
| Bodianus_axillaris_juv    | 34                    | 1614.913                    | 47.600                    | Lanridae       | Bodianus      |
| Caesio_lunaris            | 35                    | 1284.753                    | 46.453                    | Caesionidae    | Caesio        |
| Caesio_suevica            | 36                    | 1446.285                    | 50.000                    | Caesionidae    | Caesio        |
| Caesio_xanthonota         | 37                    | 1437.194                    | 47.910                    | Caesionidae    | Caesio        |
| Caranx_melampygus         | 38                    | 1373.528                    | 48.708                    | Carangidae     | Caranx        |
| Centropyge_multispinis    | 39                    | 1356.901                    | 49.226                    | Pomacanthidae  | Centropyge    |
| Cephalopholis_argus       | 40                    | 1543.276                    | 48.568                    | Serranidae     | Cephalopholis |

|                               |    |          |        |                |             |
|-------------------------------|----|----------|--------|----------------|-------------|
| Chaetodon_auriga              | 41 | 1726.262 | 48.788 | Chaetodontidae | Chaetodon   |
| Chaetodon_auriga_juv          | 42 | 1731.945 | 47.599 | Chaetodontidae | Chaetodon   |
| Chaetodon_falcula             | 43 | 1682.616 | 46.980 | Chaetodontidae | Chaetodon   |
| Chaetodon_guttatissimus       | 44 | 1641.312 | 47.680 | Chaetodontidae | Chaetodon   |
| Chaetodon_kleinii             | 45 | 1579.544 | 47.697 | Chaetodontidae | Chaetodon   |
| Chaetodon_kleinii2            | 46 | 1521.509 | 50.357 | Chaetodontidae | Chaetodon   |
| Chaetodon_melannotus          | 47 | 1665.913 | 48.025 | Chaetodontidae | Chaetodon   |
| Chaetodon_meyeri              | 48 | 1771.345 | 50.962 | Chaetodontidae | Chaetodon   |
| Chaetodon_trifascialis        | 49 | 1610.986 | 47.149 | Chaetodontidae | Chaetodon   |
| Chaetodon_trifasciatus        | 50 | 1683.970 | 48.162 | Chaetodontidae | Chaetodon   |
| Chaetodon_vagabundus          | 51 | 1621.902 | 45.466 | Chaetodontidae | Chaetodon   |
| Chaetodon_lunula              | 52 | 1665.822 | 50.258 | Chaetodontidae | Chaetodon   |
| Cheilinus_fasciatus           | 53 | 1428.620 | 48.515 | Labridae       | Cheilinus   |
| Cheilinus_fasciatus_juv       | 54 | 1343.000 | 46.447 | Labridae       | Cheilinus   |
| Chlorurus_sordidus_fem        | 55 | 1176.764 | 48.792 | Scaridae       | Chlorurus   |
| Chlorurus_sordidus_male       | 56 | 1742.657 | 49.121 | Scaridae       | Chlorurus   |
| choerodon_graphicus           | 57 | 1562.662 | 49.215 | Labridae       | Choerodon   |
| Chromis_atripectoralis        | 58 | 1607.506 | 47.546 | Pomacentridae  | Chromis     |
| Chromis_dimidiata             | 59 | 1493.152 | 50.259 | Pomacentridae  | Chromis     |
| Chromis_nigroanalis           | 60 | 1329.235 | 48.689 | Pomacentridae  | Chromis     |
| Chromis_ternatensis           | 61 | 1297.676 | 48.549 | Pomacentridae  | Chromis     |
| Chromis_viridis               | 62 | 1523.562 | 50.016 | Pomacentridae  | Chromis     |
| Chromis_weberi                | 63 | 1341.033 | 46.362 | Pomacentridae  | Chromis     |
| Chrysiptera_annulata          | 64 | 1492.838 | 48.422 | Pomacentridae  | Chrysiptera |
| Coris_aygula_fem              | 65 | 1550.794 | 51.033 | Labridae       | Coris       |
| Coris_aygula_juv              | 66 | 1658.440 | 47.517 | Labridae       | Coris       |
| Coris_aygula_male             | 67 | 1264.187 | 48.419 | Labridae       | Coris       |
| Ctenochaetus_striatus         | 68 | 1295.176 | 48.882 | Pomacentridae  | Chrysiptera |
| Dascyllus_aruanus             | 69 | 1457.546 | 49.744 | Pomacentridae  | Dascyllus   |
| Dascyllus_carneus             | 70 | 1449.161 | 47.452 | Pomacentridae  | Dascyllus   |
| Dascyllus_trimaculatus        | 71 | 1246.354 | 47.128 | Pomacentridae  | Dascyllus   |
| Dascyllus_trimaculatus_juv    | 72 | 1502.770 | 50.198 | Pomacentridae  | Dascyllus   |
| Echeneis_naucrates            | 73 | 1473.537 | 48.099 | Echeneidae     | Echeneis    |
| Epinephelus_areolatus         | 74 | 1436.011 | 49.744 | Serranidae     | Epinephelus |
| Forcipiger_longirostris       | 75 | 1787.611 | 48.294 | Chaetodontidae | Forcipiger  |
| Gomphosus_caeruleus_femelle   | 76 | 1346.585 | 49.318 | Labridae       | Gomphosus   |
| Gomphosus_caeruleus_juv       | 77 | 1211.942 | 48.033 | Labridae       | Gomphosus   |
| Gomphosus_caeruleus_male      | 78 | 1418.441 | 49.103 | Labridae       | Gomphosus   |
| Gymnothorax_favagineus        | 79 | 1532.579 | 53.479 | Muraenidae     | Gymnothorax |
| Halichoeres_cosmetus_fem      | 80 | 1666.229 | 48.332 | Labridae       | Halichoeres |
| Halichoeres_cosmetus_male     | 81 | 1572.430 | 45.261 | Labridae       | Halichoeres |
| Halichoeres_hortulanus_female | 82 | 1514.069 | 47.062 | Labridae       | Halichoeres |
| Halichoeres_hortulanus_male   | 83 | 1543.035 | 48.728 | Labridae       | Halichoeres |
| Hemigymnus_fasciatus          | 84 | 1356.386 | 47.818 | Labridae       | Hemigymnus  |
| Heniochus_acuminatus          | 85 | 1803.594 | 47.824 | Chaetodontidae | Heniochus   |
| Kyphosus_cinereus             | 86 | 1412.319 | 50.225 | Kyphosidae     | Kyphosus    |
| Labrichtys_unilineatus_fem    | 87 | 1128.443 | 48.766 | Labridae       | Labrichtys  |
| Labrichtys_unilineatus_juv    | 88 | 1365.743 | 50.577 | Labridae       | Labrichtys  |

|                                   |     |          |        |               |                    |
|-----------------------------------|-----|----------|--------|---------------|--------------------|
| Labrichtys_unilineatus_male       | 89  | 1551.732 | 48.594 | Labridae      | Labrichtys         |
| Labroides_bicolor                 | 90  | 1269.355 | 51.166 | Labridae      | Labroides          |
| Labroides_dimidiatus              | 91  | 1508.537 | 46.383 | Labridae      | Labroides          |
| Labropsis_xanthonota              | 92  | 1501.658 | 48.338 | Labridae      | Labroides          |
| Labropsis_xanthonota_juv          | 93  | 1463.703 | 48.383 | Labridae      | Labropsis          |
| Lutjanus_bohar                    | 94  | 1298.740 | 48.167 | Lutjanidae    | Lutjanus           |
| Lutjanus_fulviflamma              | 95  | 1276.153 | 46.797 | Lutjanidae    | Lutjanus           |
| Lutjanus_kasmira                  | 96  | 1557.753 | 47.936 | Lutjanidae    | Lutjanus           |
| Macolor_niger                     | 97  | 1199.943 | 49.327 | Lutjanidae    | Macolor            |
| Macolor_niger_juv                 | 98  | 1761.500 | 48.884 | Balistidae    | Macolor            |
| Malacanthus_lattovitatus          | 99  | 1446.719 | 48.874 | Malacanthidae | Malacanthus        |
| Melichthys_niger                  | 100 | 1523.516 | 52.405 | Balistidae    | Melichthys         |
| Monotaxis_grandoculis             | 101 | 1245.255 | 50.108 | Lethrinidae   | Monotaxis          |
| Monotaxis_grandoculis_juv         | 102 | 1333.121 | 47.401 | Lethrinidae   | Monotaxis          |
| Myripristis_violacea              | 103 | 1389.331 | 49.087 | Holocentridae | Myripristis        |
| Naso_brachycentron                | 104 | 1207.083 | 47.555 | Acanthuridae  | Naso               |
| Naso_brevirostris_fem             | 105 | 1327.240 | 49.903 | Acanthuridae  | Naso               |
| Naso_brevirostris_juv             | 106 | 1489.458 | 50.558 | Acanthuridae  | Naso               |
| Naso_brevirostris_male            | 107 | 1391.025 | 48.615 | Acanthuridae  | Naso               |
| Naso_elegans                      | 108 | 1558.736 | 49.272 | Acanthuridae  | Naso               |
| Naso_unicornis                    | 109 | 1497.666 | 50.266 | Acanthuridae  | Naso               |
| Nemateleotris_magnifica           | 110 | 1544.072 | 49.357 | Microdesmidae | Nemateleotris      |
| Neoglyphidodon_melas              | 111 | 1412.636 | 52.149 | Pomacentridae | Neoglyphidodon     |
| Neoglyphidodon_melas_juv          | 112 | 1592.078 | 46.828 | Pomacentridae | Neoglyphidodon     |
| Ostracion_meleagris_fem           | 113 | 1707.288 | 50.135 | Ostracidae    | Ostracion          |
| Ostracion_meleagris_male          | 114 | 1581.139 | 49.516 | Ostracidae    | Ostracion          |
| Oxycheilinus_digamma              | 115 | 1436.700 | 46.121 | Labridae      | Oxycheilinus       |
| Oxymonacanthus_longirostris       | 116 | 1854.461 | 48.428 | Monacanthidae | Oxymonacanthus     |
| Paracanthurus_hepatus             | 117 | 1832.893 | 47.503 | Acanthuridae  | Paracanthurus      |
| Paraluteres_prionurus             | 118 | 1579.873 | 49.883 | Monacanthidae | Paraluteres        |
| Parapercis_hexophtalma_fem        | 119 | 1474.912 | 46.440 | Pinguipedidae | Parapercis         |
| Parapercis_hexophtalma_male       | 120 | 1427.876 | 47.987 | Pinguipedidae | Parapercis         |
| Parupeneus_cyclostomus            | 121 | 1271.789 | 49.161 | Mullidae      | Parupeneus         |
| Parupeneus_macronema              | 122 | 1350.852 | 50.593 | Mullidae      | Parupeneus         |
| Parupeneus_trifasciatus           | 123 | 1555.653 | 48.858 | Mullidae      | Parupeneus         |
| Plagiotremus_rhinorhynchos_black  | 124 | 1392.489 | 49.938 | Bleniidae     | Plagiotremus       |
| Plagiotremus_rhinorhynchos_orange | 125 | 1430.339 | 48.667 | Bleniidae     | Plagiotremus       |
| Plectopromus_pessuliferus         | 126 | 1535.095 | 47.039 | Serranidae    | Plectopromus       |
| Plectorhinchus_vittatus           | 127 | 1639.710 | 48.159 | Haemulidae    | Plectorhinchus     |
| Plectorhinchus_vittatus_juv       | 128 | 1671.393 | 48.218 | Haemulidae    | Plectorhinchus     |
| Plectroglyphidodon_dickii         | 129 | 1554.100 | 48.914 | Pomacentridae | Plectroglyphidodon |
| Plectroglyphidodon_johnstonianus  | 130 | 1384.192 | 48.808 | Pomacentridae | Plectroglyphidodon |
| Plectroglyphidodon_lacrymatus     | 131 | 1578.811 | 47.948 | Pomacentridae | Plectroglyphidodon |
| Plectropomus_laevis               | 132 | 1489.358 | 47.171 | Serranidae    | Plectropomus       |
| Pomacanthus_semicirculatus        | 133 | 1964.861 | 46.982 | Pomacentridae | Pomacentrus        |
| Pomacentrus_caeruleus             | 134 | 1719.621 | 49.891 | Pomacentridae | Pomacentrus        |
| Pomacentrus_sulfureus             | 135 | 1529.585 | 47.039 | Pomacentridae | Pomacentrus        |
| Pseudanthias_squamipinnis_fem     | 136 | 1566.014 | 48.306 | Serranidae    | Pseudanthias       |



|                                |     |          |        |               |              |
|--------------------------------|-----|----------|--------|---------------|--------------|
| Pseudanthias_squamipinnis_male | 137 | 1653.831 | 50.897 | Serranidae    | Pseudanthias |
| Pterois_volitans               | 138 | 1784.876 | 52.496 | Scorpaenidae  | Pterois      |
| Pygoplites_diacanthus          | 139 | 1839.414 | 47.570 | Pomacanthidae | Pygoplites   |
| Pygoplites_diacanthus_juv      | 140 | 1758.483 | 48.316 | Pomacanthidae | Pygoplites   |
| Rhinecanthus_aculeatus         | 141 | 1661.760 | 49.398 | Balistidae    | Rhinecanthus |
| Sargocentron_caudimaculatus    | 142 | 1579.747 | 49.011 | Holocentridae | Sargocentron |
| Sargocentron_diadema           | 143 | 1530.232 | 48.613 | Holocentridae | Sargocentron |
| Sargocentron_praslin           | 144 | 1473.850 | 50.619 | Holocentridae | Sargocentron |
| Scarus_caudofasciatus_fem      | 145 | 1368.838 | 50.551 | Scaridae      | Scarus       |
| Scarus_caudofasciatus_male     | 146 | 1545.727 | 49.015 | Scaridae      | Scarus       |
| Scarus_frenatus_fem            | 147 | 1372.558 | 50.968 | Scaridae      | Scarus       |
| Scarus_frenatus_male           | 148 | 1616.512 | 48.294 | Scaridae      | Scarus       |
| Scarus_niger_fem               | 149 | 1356.840 | 47.290 | Scaridae      | Scarus       |
| Scarus_niger_juv               | 150 | 1420.512 | 51.393 | Scaridae      | Scarus       |
| Scarus_niger_male              | 151 | 1471.099 | 48.460 | Scaridae      | Scarus       |
| Scarus_tricolor_fem            | 152 | 1247.431 | 49.961 | Scaridae      | Scarus       |
| Scarus_tricolor_male           | 153 | 1635.935 | 47.338 | Scaridae      | Scarus       |
| Scolopsis_ghanam               | 154 | 1304.879 | 48.829 | Nemipteridae  | Scolopsis    |
| Stegastes_peliciery            | 155 | 1307.369 | 48.313 | Pomacentridae | Stegastes    |
| stethojulis_albovittata_fem    | 156 | 1343.595 | 48.992 | Labridae      | Stethojulis  |
| stethojulis_albovittata_male   | 157 | 1556.294 | 46.996 | Labridae      | Stethojulis  |
| sufflamen_bursa                | 158 | 1539.378 | 49.673 | Balistidae    | Sufflamen    |
| Sufflamen_chrysopterum         | 159 | 1398.014 | 48.922 | Balistidae    | Sufflamen    |
| Thalassoma_amblycephalum_fem   | 160 | 1307.490 | 49.536 | Labridae      | Thalassoma   |
| Thalassoma_amblycephalum_male  | 161 | 1390.949 | 48.117 | Labridae      | Thalassoma   |
| Thalassoma_hardwicke           | 162 | 1609.134 | 47.277 | Labridae      | Thalassoma   |
| Thalassoma_hebraicum           | 163 | 1470.280 | 47.883 | Labridae      | Thalassoma   |
| Thalassoma_lunare_fem          | 164 | 1456.690 | 47.696 | Labridae      | Thalassoma   |
| Thalassoma_lunare_male         | 165 | 1658.945 | 48.012 | Labridae      | Thalassoma   |
| Thalassoma_purpureum_fem       | 166 | 1410.546 | 48.752 | Labridae      | Thalassoma   |
| Thalassoma_purpureum_male      | 167 | 1809.357 | 47.284 | Labridae      | Thalassoma   |
| Zanclus_cornutus               | 168 | 1876.378 | 49.681 | Zanclidae     | Zanclus      |
| Zebrasoma_scopas               | 169 | 1482.712 | 46.801 | Acanthuridae  | Zebrasoma    |
